# Supplementary material
Source: ML conference proceedings conference paper supplement (https://openaccess.thecvf.com/content/ICCV_2019/html/Quan_Deep_Learning_for_ICCV_2019_paper.html)
Supplement: Supplementary file 1 [file Quan_Deep_Learning_for_ICCV_2019_supplemental.pdf]

## Supplementary materials for ”Deep Learning for Seeing Through Window With Raindrops”

### A. More results on the torque-based measure

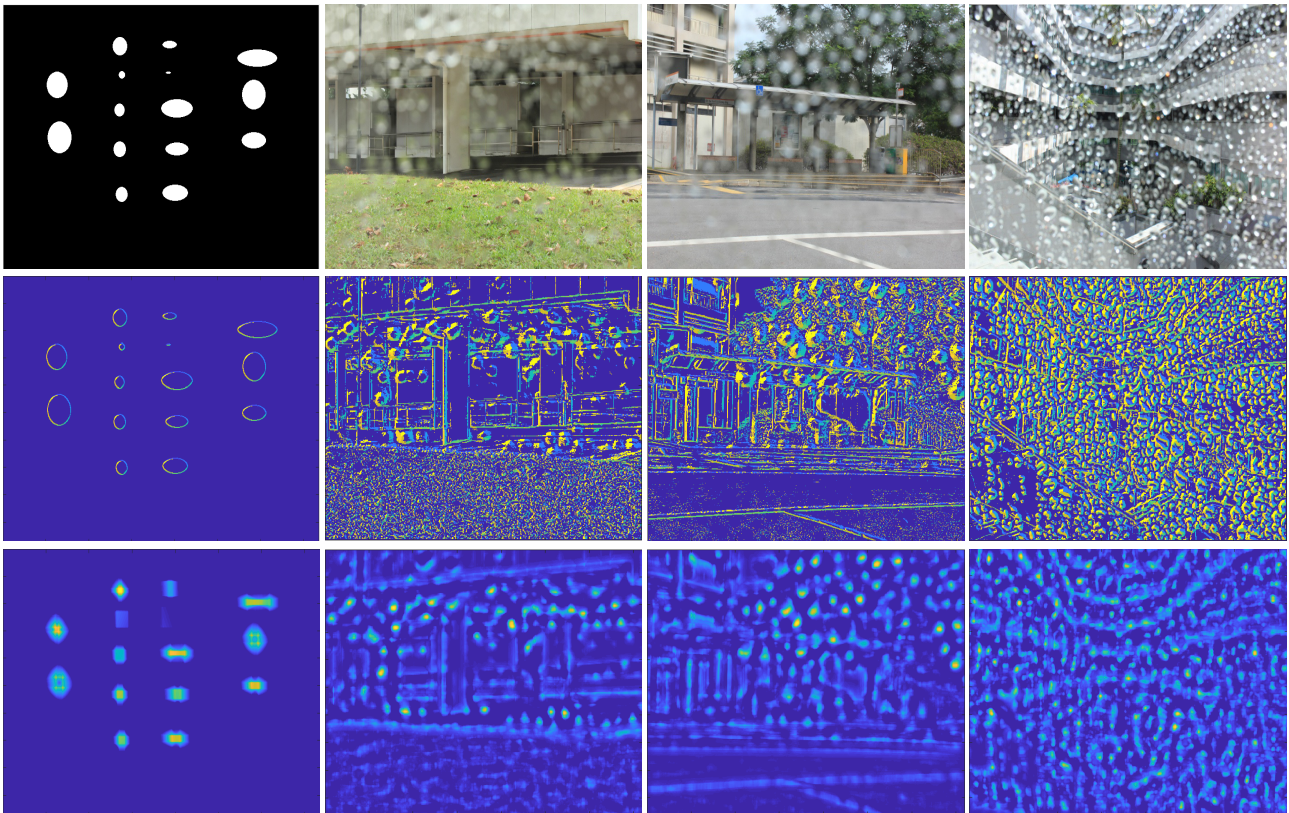

Figure 1: Torque-based measure computed on different images. Rows from top to bottom: Input images, edge maps, and proposed measure map computed on input images.



## B. More results on real images taken by mobile phones

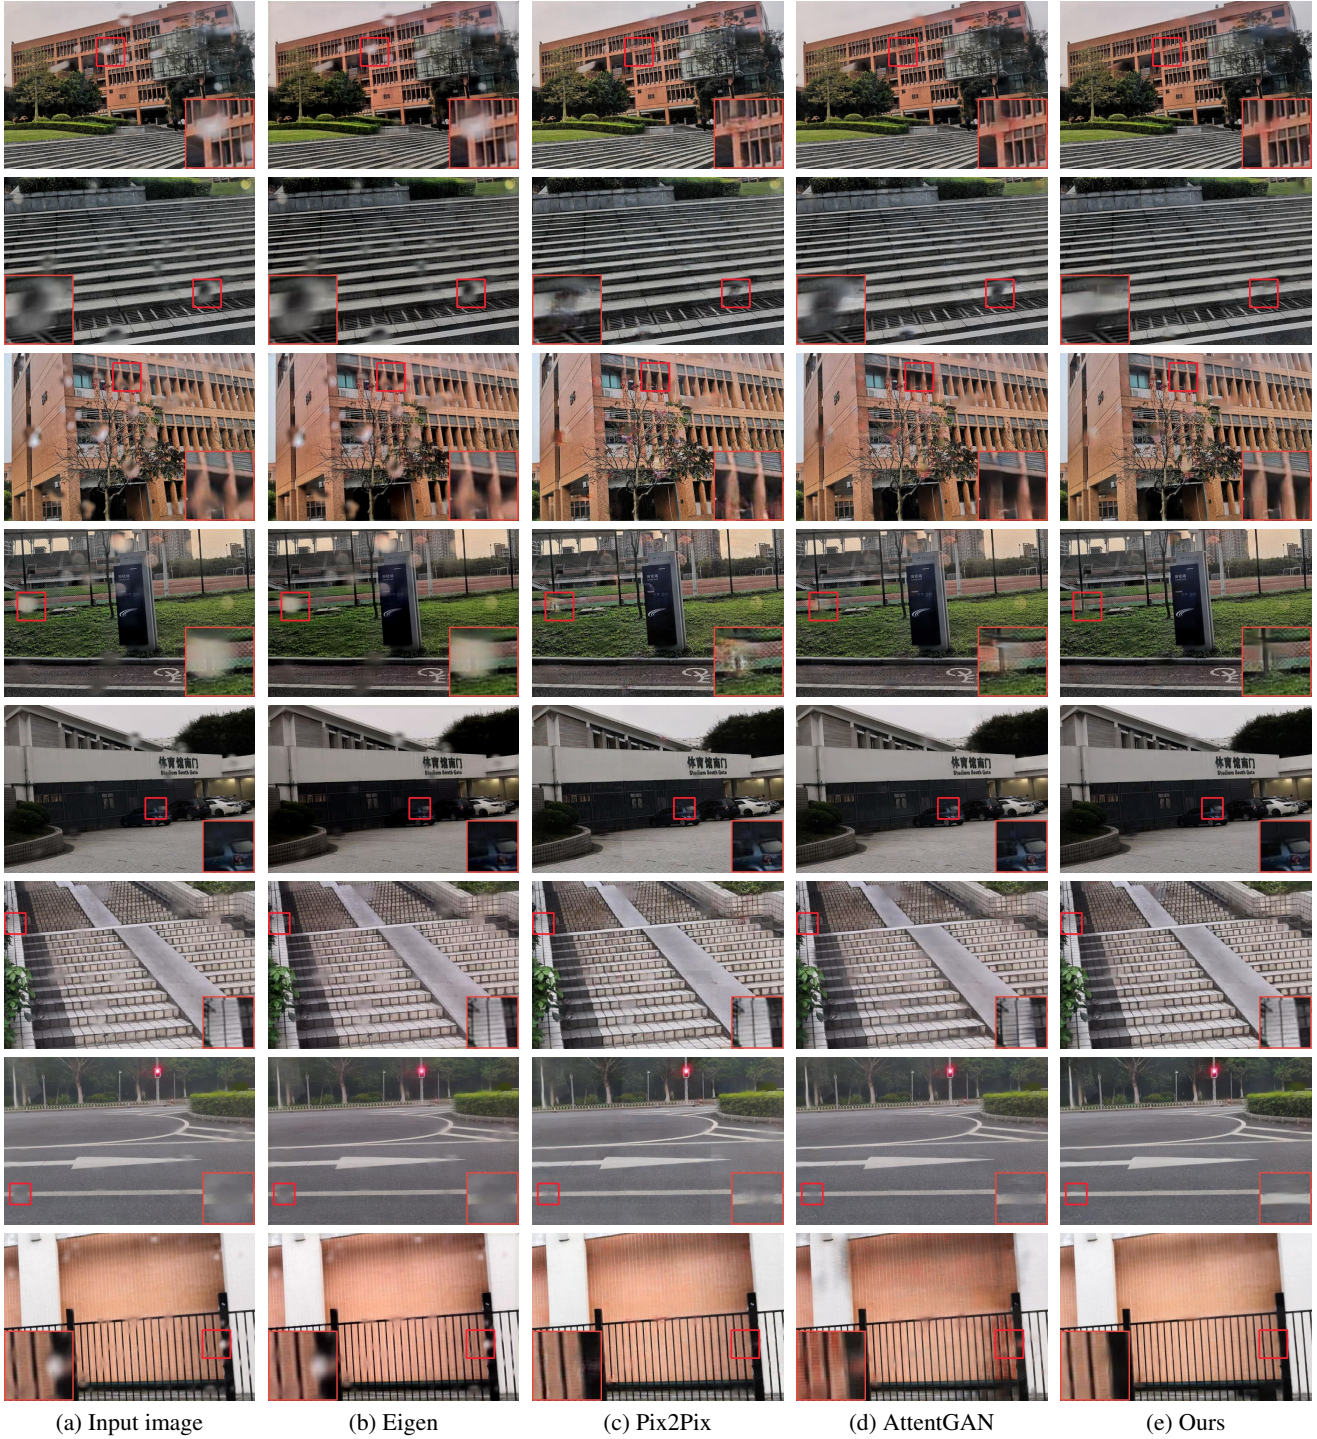

Figure 2: Visual results of different methods on real-world images taken by mobile phones. The image were taken indoor or inside a car.



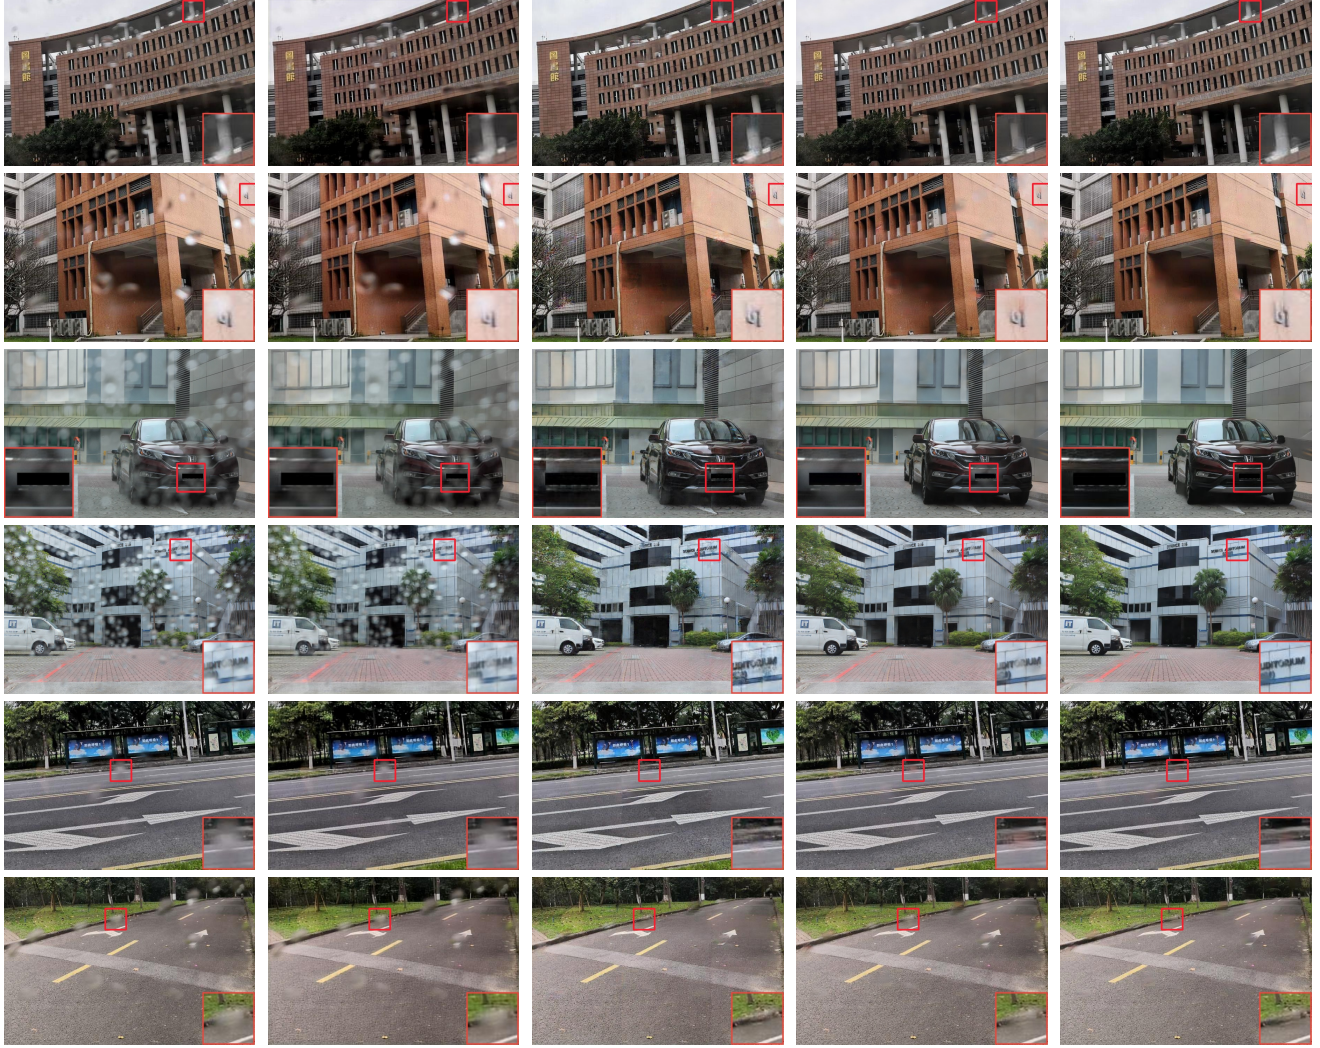

(a) Input image

(b) Eigen

(c) Pix2Pix

(d) AttentGAN

(e) Ours

Figure 3: Visual results of different methods on real-world images taken by mobile phones. (Cont'd)

### C. Visualization of the examples of attention maps

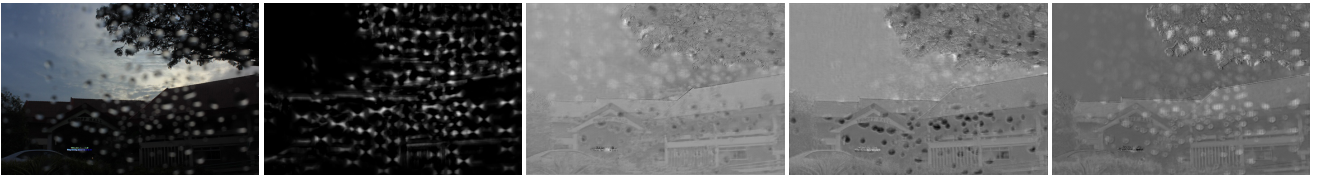

Figure 4: From left to right: Input, shape-driven attention  $A_s$ , attentive feature map  $F'$ , and two channel-attentive feature maps with different attention scores, all obtained on the 17th block.
